# Supplementary material for: How a quantum computer could accurately solve a hydrogen-air combustion model
Source: Royal Society of Chemistry journal article supplement (doi:10.1039/d2dd00049k), 2022-01-01
Supplement: d2dd00049k1.pdf [file d2dd00049k1.pdf]

## Supporting Information

Alejandro Becerra,<sup>1,2,3</sup> Oscar Homero Diaz-Ibarra,<sup>4</sup> Kyungjoo Kim,<sup>4</sup> Bert Debuschere<sup>4</sup>, Eric A. Walker<sup>5,6,\*</sup>

<sup>1</sup>*Institute for Artificial Intelligence and Data Science, The State University of New York at Buffalo, 14260, USA*

<sup>2</sup>*Data Intensive Studies Center, Tufts University, Medford, MA 02155, USA*

<sup>3</sup>*Department of Mathematics, Tufts University, Medford, MA 02155, USA*

<sup>4</sup>*Sandia National Laboratories, Livermore, CA 94551, USA*

<sup>5</sup>*Department of Chemical and Biological Engineering, The State University of New York at Buffalo, 14260, USA*

<sup>6</sup>*Linde plc, 175 E Park Dr, Tonawanda, NY 14150*

---

\* Corresponding author at:  
Institute for Artificial Intelligence and Data Science, The State University of New York at Buffalo, 14260, USA  
Tel: +1 716 881 8989  
E-mail address: [ericwalk@buffalo.edu](mailto:ericwalk@buffalo.edu)



Table S2. Table of RHS values.

|                   |            |
|-------------------|------------|
| $T$               | -8.369E+01 |
| $\theta_{H_2}$    | -1.124E-03 |
| $\theta_{O_2}$    | -1.784E-02 |
| $\theta_O$        | 8.762E-12  |
| $\theta_{OH}$     | 0.000E+00  |
| $\theta_{H_2O}$   | 0.000E+00  |
| $\theta_H$        | 5.618E-04  |
| $\theta_{HO_2}$   | 1.840E-02  |
| $\theta_{H_2O_2}$ | 0.000E+00  |
| $\theta_{Ar}$     | 0.000E+00  |

Table S3. Table of initial state vector values.

|                   |      |
|-------------------|------|
| $T$               | 1200 |
| $\theta_{H_2}$    | 0.05 |
| $\theta_{O_2}$    | 0.45 |
| $\theta_O$        | 0    |
| $\theta_{OH}$     | 0    |
| $\theta_{H_2O}$   | 0    |
| $\theta_H$        | 0    |
| $\theta_{HO_2}$   | 0    |
| $\theta_{H_2O_2}$ | 0    |
| $\theta_{Ar}$     | 0.5  |

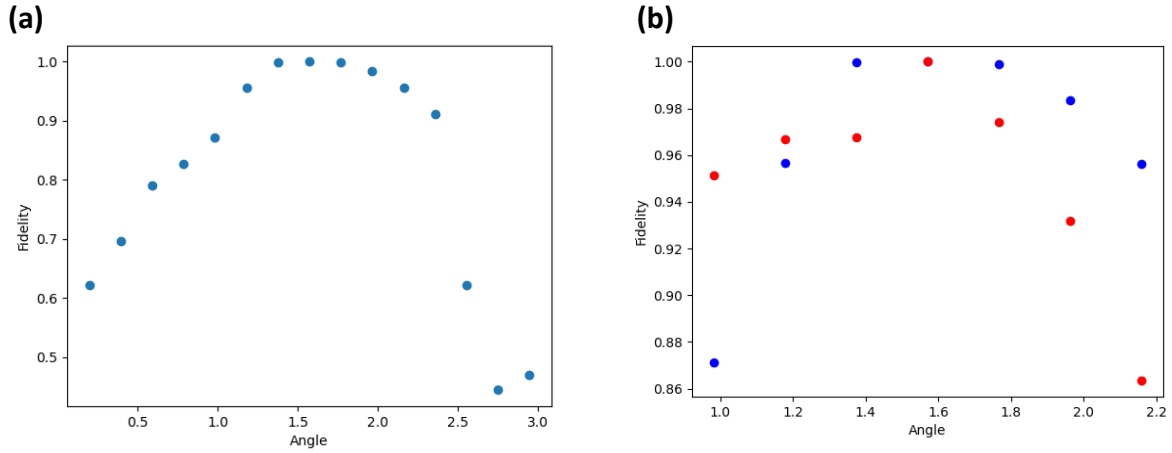

Figure S1. Fidelity of quantum solution based upon angle between vectors in  $2 \times 2$  matrix  $A$ . For the blue points in (b), the first row of each matrix  $A$  was the vector  $[1 \ 0]$  and the second row of each matrix  $A$  was a rotation of this vector by some angle  $\theta$  (increments of  $\frac{\pi}{16}$  radians). For the red points in (b), these rows are permuted. In other words, the first row and the second row are

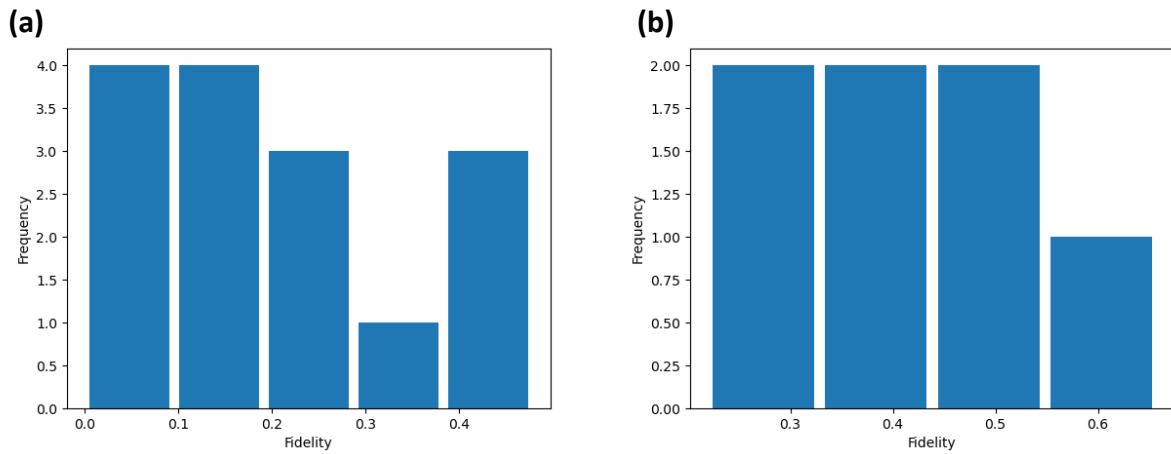

swapped.

Figure S2. Fidelity of quantum solution with random orthogonal matrices  $A$ .

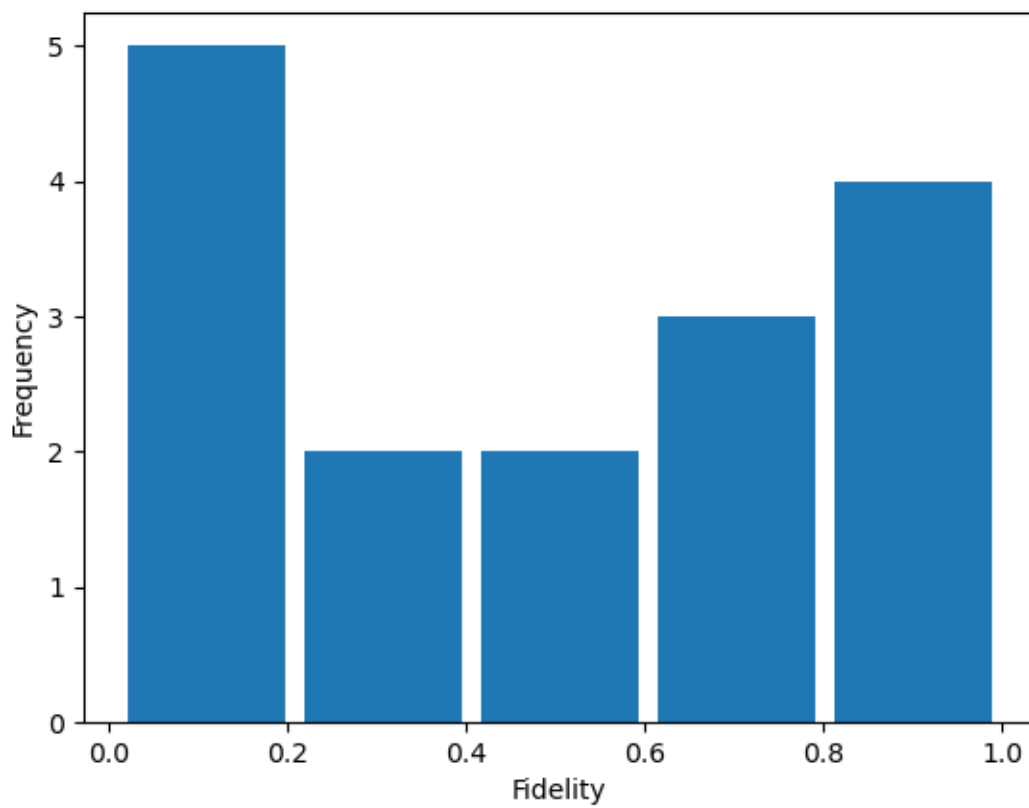

Figure S3. Fidelity of quantum solution to linear systems of equations ( $Ax = b$ ) with random orthonormal matrices  $A$ .

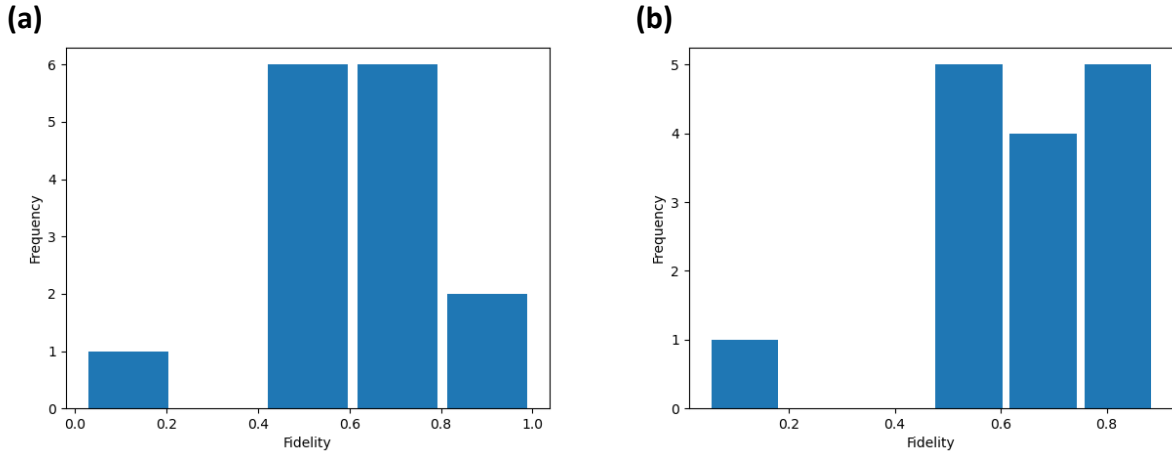

Figure S4. Fidelity of quantum solution to linear systems of equations ( $Ax = b$ ) with random

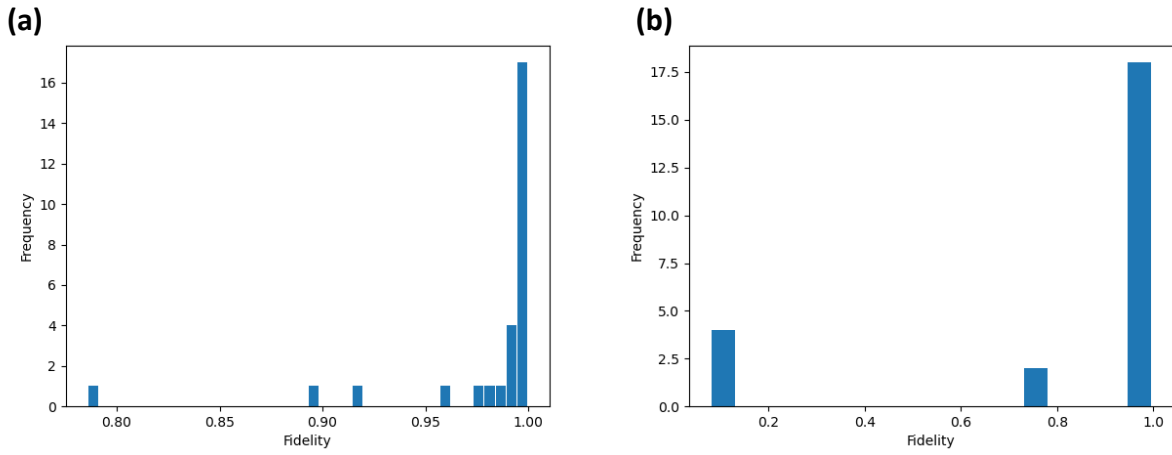

diagonal matrices  $A$ .

Figure S5. Fidelity of quantum solution to linear systems of equations ( $Ax = b$ ) with random matrices  $A$  and select vectors  $b = \lambda v$  (for some eigenvalue  $\lambda$  and eigenvector  $v$  pair of  $A$ ).

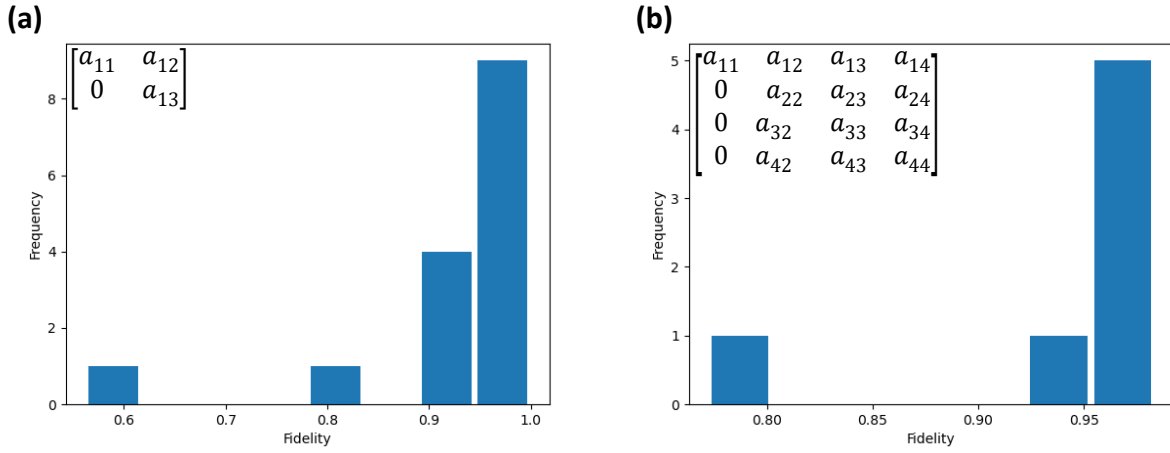

Figure S6. Fidelity of quantum solution to linear systems of equations ( $Ax = b$ ) with random matrices  $A$  of the forms shown above. (a) Two-dimensional. (b) Four-dimensional.
